1 ***Lotus japonicus* symbiosis signaling genes and their role in the establishment of root-**  
2 **associated bacterial and fungal communities**

3 Rafal Zgadza<sup>§ 1,2</sup>, Thorsten Thiergart<sup>§ 1</sup>, Zoltán Bozsóki<sup>3</sup>, Ruben Garrido-Oter<sup>1,2</sup>, Simona  
4 Radutoiu<sup>\*3</sup>, and Paul Schulze-Lefert<sup>\*1,2</sup>

5 <sup>1</sup>Max Planck Institute for Plant Breeding Research, 50829 Cologne, Germany.

6 <sup>2</sup>Cluster of Excellence on Plant Sciences (CEPLAS), Max Planck Institute for Plant Breeding  
7 Research, 50829 Cologne, Germany.

8 <sup>3</sup>Department of Molecular Biology and Genetics, Faculty of Science and Technology, Aarhus  
9 University, 8000 C Aarhus, Denmark.

10 § joint first authors

11 \* co-corresponding authors, (radutoiu@mbg.au.dk , S.R., schlef@mpipz.mpg.de , P.S.-L.)

12

13

14

15

16

17

18

19

20

21

## 22 **Abstract**

23 The wild legume *Lotus japonicus* engages in mutualistic symbiotic relationships with arbuscular  
24 mycorrhiza (AM) fungi and nitrogen-fixing rhizobia. Using plants grown in natural soil and  
25 community profiling of bacterial 16S *rRNA* genes and fungal internal transcribed spacers (ITS), we  
26 examined here the role of the *Lotus* symbiosis genes *RAM1*, *NFR5*, *SYMRK*, and *CCaMK* in  
27 structuring bacterial and fungal root-associated communities. We found host genotype-dependent  
28 community shifts in the root and rhizosphere compartments that were mainly confined to bacteria  
29 in *nfr5* or fungi in *ram1* mutants, whilst *symRK* and *ccamk* plants displayed major changes across  
30 both microbial kingdoms. We observed in all AM mutant roots an almost complete depletion of a  
31 large number of Glomeromycota taxa that was accompanied by a concomitant enrichment of  
32 Helotiales and *Nectriaceae* fungi, suggesting compensatory niche replacement within the fungal  
33 community. A subset of Glomeromycota whose colonization is strictly dependent on the common  
34 symbiosis pathway was retained in *ram1* mutants, indicating that *RAM1* is dispensable for  
35 intraradical colonization by some Glomeromycota fungi. However, intraradical colonization by  
36 certain Burkholderiaceae taxa is dependent on AM root infection, thereby revealing a microbial  
37 interkingdom interaction. Our findings imply a broad role for *Lotus* symbiosis genes in structuring  
38 the root microbiota.

## 39 Introduction

40 Mutualistic plant-microbe interactions are essential adaptive responses dating back to plant  
41 colonization of terrestrial habitats [1,2]. Endosymbiotic association with obligate arbuscular  
42 mycorrhizal (AM) fungi belonging to the phylum Glomeromycota is considered to have enabled  
43 early land plants to adapt to and survive harsh edaphic conditions by improving the acquisition of  
44 nutrients, especially phosphorus, and water from soil [3]. It is estimated that approximately 80% of  
45 extant plant species remain proficient in AM symbiosis (AMS), testifying to its importance for  
46 survival in natural ecosystems [4,5,6]. Another more recent endosymbiotic relationship has evolved  
47 between plants belonging to distinct lineages of flowering plants (Fabales, Fagales, Cucurbitales,  
48 and Rosales) and nitrogen-fixing members of the Burkholderiales, Rhizobiales or Actinomycetales,  
49 enabling survival on nitrogen-poor soils. These bacteria fix atmospheric nitrogen under the low  
50 oxygen conditions which are provided by plant root nodules.

51 Studies of mutant legumes deficient in both AM and RNS revealed that a set of genes defined as  
52 the common symbiotic signaling pathway (CSSP) are crucial for these symbioses. In the model  
53 legume *Lotus japonicus*, Nod factor perception by NFR1 and NFR5 activates downstream  
54 signaling through SYMRK, a malectin and leucine-rich repeat (LRR)-containing RLK [7], currently  
55 considered to be the first component of the CSSP. SYMRK associates with NFR5 through a  
56 mechanism involving intramolecular cleavage of the SYMRK ectodomain, thereby exposing its  
57 LRR domains [8]. Signaling from the plasma membrane is transduced to the nuclear envelope  
58 where ion channels [9,10], nuclear pore proteins [11,12,13] and cyclic nucleotide-gated channels  
59 [14] mediate symbiotic calcium oscillations. These calcium oscillations are interpreted by the  
60 calcium- and calmodulin-dependent protein kinase CCaMK, [15,16] that interacts with the DNA  
61 binding transcriptional activator CYCLOPS [17,18,19]. Several GRAS transcription factors (NSP1,  
62 NSP2, RAM1, RAD1) are activated downstream of CCaMK and CYCLOPS and determine whether  
63 plants engage in AMS or RNS symbiosis.

64 Plants establish the symbioses with AM fungi and nitrogen-fixing bacteria by selecting interacting  
65 partners from the taxonomically diverse soil biome. These interactions are driven by low mineral  
66 nutrient availability in soil and induce major changes in host and microbial symbiont metabolism  
67 [20,21]. Although RNS develops as localized events on legume roots, analysis of *Lotus* mutants  
68 impaired in their ability to engage in symbiosis with nitrogen-fixing bacteria revealed that these  
69 mutations do not only abrogate RNS, but also impact the composition of taxonomically diverse  
70 root- and rhizosphere-associated bacterial communities, indicating an effect on multiple bacterial

71 taxa that actively associate with the legume host, irrespective of their symbiotic capacity [22]. By  
72 contrast, the effect of AMS is known to extend outside the host *via* a hyphal network that can  
73 penetrate the surrounding soil and even indirectly affect adjacent plants [23]. In soil, fungal hyphae  
74 themselves represent environmental niches and are populated by a specific set of microbes [24].  
75 Although the biology of AMF is well understood, the potential role of AMS on root-associated  
76 bacterial and fungal communities is currently unknown.

77 Here we used mutants impaired in RNS, AM, or both to address the role of symbiosis signaling  
78 genes in structuring bacterial and fungal root-associated communities in *Lotus* plants grown in  
79 natural soil. We show that genetic disruption of these symbioses results in significant host  
80 genotype-dependent microbial community shifts in the root and surrounding rhizosphere  
81 compartments. These changes were mainly confined to either bacterial or fungal communities in  
82 RNS- or AM-deficient plant lines, respectively, whereas mutants with defects in the CSPP revealed  
83 major changes in assemblages of the root microbiota across both microbial kingdoms.

## 84 **Materials and Methods**

### 85 **Preparation and storage of soil**

86 The soil batches used in this study were collected from Max Planck Institute for Plant Breeding  
87 Research agricultural field located in Cologne, Germany (50.958N, 6.865E) in the following  
88 seasons: CAS11-spring/autumn 2016, CAS12-spring 2017. The field had not been cultivated in  
89 previous years, no fertilizer or pesticide administration took place at the harvesting site. Following  
90 harvest, soil was sieved, homogenized and stored at 4 °C for further use.

### 91 **Soil and plant material**

92 All studied *L. japonicus* symbiosis-deficient mutants, *nfr5-2* [ref. 25], *ram1-2* [ref. 26], *symrk-3* [ref.  
93 7] and *ccamk-13* [ref. 27], originated from the Gifu B-129 genotype.

### 94 **Plant growth and harvesting procedure**

95 The germination procedure of *L. japonicus* seeds included sandpaper scarification, surface  
96 sterilisation in 1% hypochlorite bleach (20 min, 60 rpm), followed by three washes with sterile water  
97 and incubation on wet filter paper in Petri dishes for one week (temperature: 20 °C, day/night cycle  
98 16/8h, relative humidity: 60%). For each genotype and soil batch, six to eight biological replicas

99 were prepared by potting four plants in 7x7x9 cm pot filled with corresponding batch of soil (CAS11  
100 soil six replicates, CAS12 soil eight replicated). Plants were incubated for ten weeks in the  
101 greenhouse (day/night cycle 16/8h, light intensity 6000 LUX, temperature: 20 °C, relative humidity:  
102 60%), and were watered with tap water twice per week.

103 The block of soil containing plant roots was removed from the pot and adhering soil was discarded  
104 manually. Three sample pools were collected: complete root systems (harvested 1 cm below the  
105 hypocotyl), upper fragments of the root systems (4 cm-long, starting 1 cm below the hypocotyl) and  
106 lower root system fragments (harvested from 9 cm below; the latter two were collected from plants  
107 grown in the same pot (Fig. 1a). All pools were washed twice with sterile water containing 0.02%  
108 Triton X-1000 detergent and twice with pure sterile water by vigorous shaking for 1 min. The  
109 rhizosphere compartment was derived by collection of pellet following centrifugation of the first  
110 wash solution for 10 min at 1500 g. The nodules and visible primordia were separated from  
111 washed root pools of nodulating genotypes (WT and ram1-2) with a scalpel and discarded. In order  
112 to obtain the root compartment the root sample pools were sonicated to deplete the microbiota  
113 fraction attached to the root surface. It included 10 cycles of 30-second ultrasound treatment  
114 (Bioruptor NextGen UCD-300, Diagenode) for complete root systems and upper root fragments,  
115 while for the lower root fragments the number of cycles was reduced to three. All samples were  
116 stored at -80 °C for further processing. For AM colonisation inspection the whole root system of  
117 washed soil-grown plants was stained with 5% ink in 5% acetic acid solution and inspected for  
118 intraradical infection.

119

## 120 **Generation of 16S rRNA and ITS2 fragment amplicon libraries for Illumina MiSeq** 121 **sequencing**

122 Root pool samples were homogenized by grinding in a mortar filled with liquid nitrogen and  
123 treatment with Precellys24 Tissue lyser (Bertin Technologies) for two cycles at 5600 rpm for 30  
124 sec. DNA was extracted with the FastDNA Spin Kit for Soil, according to the manufacturer's  
125 protocol (MP Bioproducts). DNA concentrations were measured fluorometrically (Quant-iT™  
126 PicoGreen dsDNA assay kit, Life Technologies, Darmstadt, Germany), and adjusted to 3.5 ng/μl.  
127 Barcoded primers targeting the variable V5-V7 region of the bacterial 16S rRNA gene (799F and  
128 1193R, [28]) or targeting the ITS2 region of the eukaryotic ribosome (fITS7 and ITS4, [29,30]) were

129 used for amplification. The amplification products were purified, pooled and subjected to  
130 sequencing with Illumina MiSeq equipment.

### 131 **Processing of 16S rRNA and ITS2 reads**

132 All libraries from root fractionation experiments as well as from the main experiments were  
133 analyzed together. Due to a very low read count for 16S data in the first experiment in CAS11 soil,  
134 this library was not included in the final analysis. This resulted in an overall lower sample number  
135 for bacteria than for fungi (222 vs. 274 samples). All sets of amplicon reads were processed as  
136 recently described [31], using a combination of QIIME [32] and USEARCH tools [33]. For both  
137 datasets paired end reads were used. For ITS2 data, forward reads were kept, in case that no  
138 paired version was available. Main steps include quality filtering of reads, de-replicating, chimera  
139 detection and OTU clustering at a 97% threshold. 16S reads were filtered against the greengenes  
140 data base [34], whereas for ITS2 the reads were checked with ITSx [35] and compared against a  
141 dedicated ITS database to remove ITS sequences from non-fungal species. Taxonomic  
142 classification was done with uclust (assign\_taxonomy from QIIME) for 16S OTUs and rdp classifier  
143 [36] for ITS2 OTUs. For the sake of consistency with NCBI taxonomic classification, the  
144 assignment of the ITS2 sequences was manually corrected so that that all OTUs assigned as  
145 *Ilyonectria* were assigned as belonging to the Sordariomycetes, Hypocreales and Nectriaceae,  
146 respectively. For 16S data, OTUs assigned as mitochondrial or chloroplast, were removed prior to  
147 analysis.

### 148 **Statistical analysis**

149 For calculating Shannon diversity indices, OTU tables were rarefied to 1000 reads. Significant  
150 differences were determined using ANOVA (aov function in R) and post-hoc Tukey test (TukeyHSD  
151 in R,  $p < 0.05$ ). For calculating Bray Curtis distances between samples, OTU tables were  
152 normalized using cumulative sum scaling (CSS, [37]). Bray-Curtis distances were used as input for  
153 principal coordinate analysis (PCoA, cmdscale function in R) plots and as input for constrained  
154 analysis of principal coordinate (CPCoA, capscale function, vegan package in R). For the latter, the  
155 analysis was constrained by genotypes (each mutant and WT separately) and corrected for the  
156 effect of soil type and experiment (using the "Condition" function). This analysis has been repeated  
157 with OTU tables from which OTUs that represent known plant symbionts (Phyllobacteriaceae for  
158 16S and Glomeromycota for ITS2) were removed before normalization, distance calculation and  
159 CPCoA. A previously described approach was used to draw ternary plots and for respective

160 enrichment analysis [22]. Fold change of OTUs between wild type and mutant plants was  
161 calculated as followed. Samples showing a read count <5000 were removed. OTUs with mean RA  
162 >0.1% across all root or rhizosphere samples, respectively, were kept for analysis. Fold change in  
163 RA from WT to mutants was calculated over all WT samples for *nfr5-2*, *ram1-2* and *symrk-3*,  
164 whereas the change to *ccamk-13* was only calculated with WT samples from experiments where  
165 *ccamk-13* mutants were present. To avoid zeros in calculation the RA of OTUs missing from  
166 samples was set to 0.001%. The significance of differences in abundance was tested using the  
167 Kruskal-Wallis test ( $p < 0.05$ ).

## 168 **Results**

### 169 **Root fractionation protocol affects the composition of associated bacterial communities**

170 Earlier physiological studies have shown that only cells of a specific developmental stage, located  
171 in the root elongation zone, respond to Myc and Nod factors, mount symbiotic calcium oscillations  
172 and enable epidermal infection by rhizosphere-derived fungal and bacterial symbionts [38,39]. To  
173 explore spatial organization of root-associated bacterial and fungal communities along the  
174 longitudinal axis, we collected samples of the upper and lower root zones as well as the entire root  
175 system of six-week-old Gifu wild-type plants, grown in Cologne soil (2 to 5 cm and >9 cm of the  
176 root system, respectively; Fig. 1A; [40]). Microbial assemblages of these three root endosphere  
177 compartments were compared to the communities in the corresponding rhizosphere fractions, i.e.  
178 soil tightly adhering to the respective root zones, and with the bacterial biome present in unplanted  
179 Cologne soil. 16S rRNA gene amplicon libraries of the V5-V7 hypervariable region and gene  
180 libraries of the Internally Transcribed Spacer 2 (ITS2) region of the eukaryotic ribosome were  
181 generated by amplification [28,29,30]. Information on the number and relative abundance of  
182 operational taxonomic units (OTUs) in each compartment was used to calculate  $\alpha$  (Shannon index;  
183 within sample diversity) and  $\beta$ -diversity (Bray-Curtis distances; between samples diversity), OTU  
184 enrichment and taxonomic composition. In bacteria we observed a gradual decrease in  $\alpha$ -diversity  
185 from unplanted soil to the rhizosphere and to the root endosphere compartments, a trend which  
186 was similar for each longitudinal root fraction. This suggests that winnowing of root commensals  
187 from the highly complex soil biome occurs in all tested root zones (Fig. S1A). Similar overall results  
188 were obtained for the fungal dataset (Fig. S1B), but the decrease in diversity from unplanted soil  
189 towards the rhizosphere was mild or even lacking. The latter finding is similar to that of a recent  
190 study of root-associated fungi in non-mycorrhizal *A. thaliana* sampled at three natural sites [31].  
191 Analyses of taxonomic composition and  $\beta$ -diversity revealed striking differences in the endosphere

192 and rhizosphere compartments associated with the upper and lower root longitudinal fractions. The  
193 composition of bacterial and fungal taxa of the whole root closely resembled that of the upper root  
194 fraction (Fig. 1B), with only low numbers of OTUs differentially abundant between these two  
195 compartments (Fig. 1C and 1D). Additionally, we observed a higher sample-to-sample variation in  
196 the taxonomic profiles of the lower root zone compared to the upper whole root fractions (Fig. 1B).  
197 This greater community variation in the developmentally younger region of *L. japonicus* roots might  
198 reflect a nascent root microbiota or greater variation in root tissue and adherent rhizosphere  
199 samples that we recovered from this root zone by our fractionation protocol. Based on the finding  
200 that whole root and upper root compartments host comparable bacterial communities and given  
201 their greater stability we decided to use the former for further analyses.

### 202 **Host genes needed for symbioses determine bacterial and fungal community composition** 203 **of *L. japonicus* root and rhizosphere**

204 For root microbiota analysis, we cultivated wild-type (ecotype Gifu) *L. japonicus* and *nfr5-2*, *symrk-*  
205 *3*, *ccamk-13* and *ram1-2* (*nfr5*, *symrK*, *ccamk* and *ram1*, from thereof) mutant genotypes in parallel  
206 in two batches of Cologne soil, to account for batch-to-batch and seasonal variation at the  
207 sampling site. *nfr5-2* mutant plants are impaired in rhizobial Nod factor perception and signaling,  
208 which prevents initiation of infection thread formation [25]. Mutations in *SymrK* and *CcamK* affect  
209 the common symbiosis pathway downstream of Nod or Myc factor perception, abrogating infection  
210 either by nitrogen fixing rhizobia or AM fungi [7,27]. The RAM1 transcription factor controls  
211 arbuscule formation, and while *ram1-2* mutants of *L. japonicus* are indistinguishable from wild type  
212 and permit incipient AM fungus infection, fungal colonization is terminated with the formation of  
213 stunted symbiotic structures [26]. All plant genotypes appeared healthy (Fig. 2A-E), but the shoot  
214 length and shoot fresh weight of all mutant plants was significantly reduced in comparison to wild  
215 type (Fig. 2F and 2G), suggesting that genetic disruption of either AM or *Rhizobium* symbiosis is  
216 detrimental for the fitness of plants grown in natural soil. Whereas all defects in nitrogen-fixing  
217 symbiosis, validated by the absence of root nodules in *nfr5-2*, *symrk-3* and *ccamk-13* genotypes  
218 (Fig. 2C-E, Table S1), resulted in similarly severe impacts on plant growth (Fig. 2F and 2G), both  
219 shoot length and shoot fresh weight were significantly reduced in *ram1-2* plants, although the  
220 effects were less severe and these plants still formed nodules and, unlike wild-type and *nfr5-2*,  
221 showed impairment in AM symbiosis (Table S1) and a less severe, but significant reduction of both  
222 shoot length and shoot fresh weight in comparison to wild type.



223 In order to determine the impact of rhizobial and AM symbiosis on root microbiota assembly, we  
224 characterized fungal and bacterial communities of unplanted Cologne soil, rhizosphere, and root  
225 compartments of all aforementioned *L. japonicus* genotypes at bolting stage. Visible nodules and  
226 root primordia were removed from the roots of nodulating wild type and *ram1-2* genotypes prior to  
227 sample processing for community profiling. We amplified the V5-V7 hypervariable region of the  
228 bacterial 16S rRNA gene and the ITS2 region of the eukaryotic ribosome. High-throughput  
229 sequencing of these amplicons yielded 22,761,657 16S and 21,228,781 ITS reads, distributed in  
230 222 and 274 samples, respectively, which were classified into 5,780 and 3,361 distinct microbial  
231 OTUs. Analysis of  $\alpha$ -diversity revealed a general reduction of complexity from unplanted soil to  
232 rhizosphere and lastly in root compartments for bacterial communities, whereas the complexity of  
233 fungal communities was largely similar for the latter two compartments (Fig. S2A and S2B), which  
234 is consistent with a recent study of *A. thaliana* root-associated fungal communities [31]. Bacterial  
235  $\alpha$ -diversity was slightly elevated in the *nfr5-2* genotype in rhizosphere and root compartments in  
236 comparison to all other genotypes (Fig. S2A). Fungal communities were similarly diverse in the  
237 rhizosphere of all tested plant genotypes, but their diversity in the root compartment was  
238 significantly and specifically reduced in all three AM mutants (*ccamk-13*, *ram1-2*, and *symrk-3*; Fig.  
239 S2B).

240 Analysis of  $\beta$ -diversity using Principal Coordinate Analysis (PCoA) of Bray-Curtis distances  
241 showed a significant effect of soil batch on soil-resident bacterial and fungal communities (Fig. S2C  
242 and D). In order to account for this technical factor and assess the impact of the different host  
243 compartment and genotypes in community composition, we performed a Canonical Analysis of  
244 Principle Components Coordinates (CAP; [41]). This revealed a clear differentiation of bacterial  
245 and fungal communities in the tested plant genotypes in both root and rhizosphere compartments,  
246 with the host genotype explaining as much as 7.61% of the overall variance of the 16S rRNA, and  
247 13.5% of ITS2 data (Fig. 3;  $P < 0.001$ ). The rhizosphere compartments of wild type and *ram1-2* were  
248 found to harbor similar bacterial communities, but were separate from those of *symrk-3* and  
249 *ccamk-13* (Fig. 3A). Further, the rhizosphere communities of each of these four plant genotypes  
250 were found to be significantly different from that of *nfr5* (Fig. 3A). A similar trend was observed for  
251 fungal communities, except that wild-type and *ram1* rhizosphere communities were clearly  
252 separated from each other (Fig. 3C). In the root compartment we found bacterial consortia that  
253 were distinctive for each of the five plant genotypes (Fig. 3B). A pronounced host genotype effect  
254 was also found for the root-associated fungal communities, but in this case the communities of  
255 wild-type and *nfr5* clustered together, indicating a high similarity (Fig. 3D). *L. japonicus* is

256 nodulated by members of *Mesorhizobium loti* belonging to the Phyllobacteriaceae family, and  
257 engages in AM symbiosis with Glomeromycota fungi. The plant genotypes included in this study  
258 differed in their capacity to accommodate nitrogen-fixing bacteria and/or AM fungi inside roots,  
259 and, consequently, the lack of these symbionts alone might explain the microbial community  
260 separation observed by CAP analysis (Fig. 3). To test whether these symbiotic microbes are the  
261 sole drivers of the observed community separations, we repeated the CAP analysis after *in silico*  
262 removal of *Phyllobacteriaceae* sequencing reads for bacterial communities, and of Glomeromycota  
263 reads for the fungal assemblages. Interestingly, although this reduced the community variance  
264 explained by host genotype across the dataset (Fig. S3 compared to Fig. 3), overall patterns of  $\beta$ -  
265 diversity remained unaltered, suggesting that other community members besides root nodule and  
266 arbuscular mycorrhizal symbionts contribute to the plant genotype-specific community shifts.  
267 Collectively, our analyses of *L. japonicus* symbiotic mutants grown in natural soil show that lack of  
268 AM and/or RNS symbioses has a significant effect on plant growth and on the structures of  
269 bacterial and fungal communities associated with legume roots.

#### 270 **Loss of symbiosis affects specific bacterial and fungal families of the root microbiota**

271 Comparison of bacterial family abundance between wild type and mutants lacking RNS and/or AM  
272 symbiosis identified significant changes in *Comamonadaceae*, *Phyllobacteriaceae*,  
273 *Methylophilaceae*, *Cytophagaceae* and *Sinobacteraceae* in the rhizosphere compartment (Fig. 4A;  
274 top 10 most abundant families). The abundance of *Comamonadaceae* and *Phyllobacteriaceae*  
275 also differed significantly in the root compartment of RNS mutants compared to wild type.  
276 *Streptomycetaceae* and *Sinobacteraceae* relative abundances were specifically affected by loss of  
277 *Nfr5*, whereas *Anaeroplamataceae* and *Burkholderiaceae* abundances were affected by the lack of  
278 AM symbiosis in *symrk* and *ccamk* plants (Fig. 4A). The relative abundances of the same two  
279 families were also significantly reduced in *ram1* roots, suggesting that active AM symbiosis  
280 influences root colonization by a subset of bacterial root microbiota taxa.

281 Six out of the ten most abundant fungal families in the rhizosphere compartment of *Lotus* plants  
282 belonged to Ascomycota (Fig. 4B). By contrast, the root endosphere was dominated by numerous  
283 families of Glomeromycota, which were found to be almost fully depleted from the rhizosphere and  
284 root compartments of *ram1*, *symrk* and *ccamk* mutants, indicating that absence of AM symbiosis  
285 predominantly affects Glomeromycota and does not limit root colonization or rhizosphere  
286 association by other fungal families. However, depletion of Glomeromycota in the AM mutant roots  
287 was accompanied by an increase in the relative abundance of Ascomycota members belonging to

288 *Nectriaceae* in both rhizosphere and root compartments and by an increased abundance of  
289 unclassified *Helotiales*, *Leotiomyces*, and *Sordariomyces* in the root compartment only (Fig.  
290 4B).

291 Closer inspection of the microbial community shifts at the OTU level identified 45 bacterial OTUs  
292 and 87 fungal OTUs enriched in the roots of symbiosis mutants compared to those of wild type  
293 (Fig. 5), and 60 bacterial OTUs and 30 differentially abundant fungal OTUs in the rhizosphere  
294 samples (Fig. S4). The absence of RNS in *nfr5-2* roots affected the relative abundance of multiple  
295 OTUs (n=27 in the root, n=23 in the rhizosphere) belonging to diverse taxa. Many of these OTUs  
296 (n=18 in the root, n=16 in the rhizosphere) showed a similar differential relative abundance in  
297 *symrk-3* and/or *ccamk-13* mutants when compared to wild type (Fig.5A), indicating that their  
298 contribution to the *Lotus* root communities outside of nodules is affected by active nitrogen fixing  
299 symbiosis. Impairment of both AM and RNS symbioses in *symrk* and/or *ccamk* mutants resulted in  
300 opposite changes in the relative root abundances of OTUs belonging to specific Burkholderiales  
301 families. Depletion of OTUs belonging to *Burkholderiaceae* (n=5) was accompanied by the  
302 enrichment of OTUs from other Burkholderiales families (*Oxalobacteraceae* [n=3],  
303 *Comamonadaceae* [n=2], and *Methylophilaceae* [n=2]; Fig. 5A). Only three of the above-  
304 mentioned *Burkholderiaceae* OTUs were depleted in *ram1* roots, suggesting that their enrichment  
305 in *Lotus* roots is dependent on functional AM symbiosis.

306 Analysis of the ITS2 amplicon sequences from root samples identified a large number of  
307 Glomeromycota OTUs (n=39); thus, *Lotus* Gifu roots grown in natural soil accommodate a  
308 phylogenetically diverse community of AM fungi (Fig. 5B). The majority of these fungal OTUs  
309 (n=31) were depleted in *symrk-3*, *ccamk-13* and *ram1-2* mutant roots, indicating that their  
310 enrichment is dependent on a functional AM symbiosis pathway. Their intraradical colonization  
311 appears to be independent of *RAM1*, as 12 OTUs assigned to Glomeromycota or to unknown taxa,  
312 nine of which define a Glomeromycota sublineage, were depleted in *symrk-3* and *ccamk-13* but not  
313 in *ram1-2* roots. A reduced abundance of Glomeromycota OTUs in the endosphere compartment  
314 was accompanied by an increased abundance of Ascomycota members, especially of members  
315 belonging to the *Nectriaceae* (8 OTUs) and *Helotiales* (7 OTUs) families, suggestive of a mutually  
316 exclusive occupancy of the intraradical niche. In sum, our results reveal that in natural soil CSSP  
317 symbiotic genes are essential for root colonization by a wide range of Glomeromycota fungi;  
318 further, these genes significantly affect the abundances of multiple bacterial taxa, predominantly  
319 belonging to the Burkholderiales and Rhizobiales orders.

## 320 Discussion

321 Here, we investigated the role of host AM and/or RNS genes in establishing structured bacterial  
322 and fungal communities in the rhizosphere and endosphere compartments of *L. japonicus* grown in  
323 natural soil. Impairment of RNS in *nfr5-2* or AMS in *ram1-2* plants had a significant impact on root  
324 microbiota structure, which was mainly confined to the composition of bacterial or fungal  
325 communities, respectively.

326 The shift between the root-associated microbial communities of wild type and *nfr5-2* mutant is in  
327 line with both the qualitative and quantitative findings of a previous report on the *Lotus* bacterial  
328 root microbiota (Fig. 3A and B in this study; [22]). However, here we observed an enhanced  
329 rhizosphere effect in both wild type and *nfr5-2* plants, leading also to a less prominent community  
330 shift in this compartment (Fig. S5). These differences in rhizosphere bacterial composition are  
331 likely caused by a soil batch effect and, to a lesser extent, possibly also the use of different  
332 sequencing platforms (Illumina versus 454 pyrosequencing). The nearly unaltered fungal  
333 community composition in *nfr5* mutant plants compared to wild type (only 3 out of 39  
334 Glomeromycota OTUs differentially abundant) suggests that NFR5 is dispensable for fungal  
335 colonization of *L. japonicus* roots. This finding, together with a massive shoot biomass reduction of  
336 *nfr5* plants in natural soil (~4-fold; Fig. 2), further reveals that intraradical colonization by soil-  
337 derived fungal endophytes is robust against major differences in plant growth.

338 A recent microbial multi-kingdom interaction study in *A. thaliana* showed that bacterial commensals  
339 of the root microbiota are crucial for the growth of a taxonomically wide range of fungal root  
340 endophytes. These antagonistic interactions between bacterial and fungal root endophytes are  
341 essential for plant survival in natural soil [31]. We have shown here that an almost complete  
342 depletion of diverse Glomeromycota taxa from roots of each of the three AM mutants was  
343 accompanied by an enrichment of OTUs belonging to the families *Nectriaceae* and Helotiales (Fig.  
344 4). We speculate that the increased relative abundance of these taxa is caused by intraradical  
345 niche replacement as a compensatory effect following the exclusion of Glomeromycota symbionts  
346 from the root compartment. Previous mono-association experiments have shown that isolates  
347 belonging to *Nectriaceae* and Helotiales can have either mutualistic or pathogenic phenotypes  
348 [42,43,44]. Given that all plant genotypes were free of disease symptoms when grown in natural  
349 soil (Fig. 2), we speculate that the complex shifts in the composition of the bacterial root microbiota  
350 in *nfr5-2*, *symRK-3*, and *ccamk-13* mutants did not affect the capacity of bacterial endophytes to  
351 prevent pathogenic fungal overgrowth. Of note, Helotiales root endophytes were also enriched in

352 roots of healthy *Arabidopsis thaliana*, a non-mycorrhizal plant species and relative of *A. thaliana*, and  
353 contribute to phosphorus nutrition of the host when grown in extremely phosphorus-impooverished  
354 soil [45]. The enrichment of Helotiales in *Lotus* AM mutants is therefore consistent with potential  
355 niche replacement by other fungal lineages to ensure plant nutrition in nutrient-impooverished soils.  
356 Although the proposed compensatory effect in AM mutants will need further experimental testing in  
357 phosphorus-depleted soils, our hypothesis is consistent with the only mild impairment in plant  
358 growth in *ram1-2* mutants (Fig. 2).

359 We identified three bacterial OTUs, all belonging to the *Burkholderiaceae* family, that are  
360 significantly depleted in the roots of each of the three AM mutants compared to wild type.  
361 Interestingly, members of the Glomeromycota have been found to contain intracellular  
362 endosymbiotic bacteria [46], some belonging to the order Burkholderiales [47]. This finding  
363 suggests that these bacteria are either endosymbionts of Glomeromycota fungi that are excluded  
364 from the roots of the AM defective genotypes or that their intraradical colonization is indirectly  
365 mediated by AM infection. The small changes in the bacterial root microbiota in *ram1-2* plants,  
366 which were mainly limited to depletion of the three aforementioned Burkholderia OTUs, revealed  
367 that root-associated bacterial community structure is remarkably robust against major changes in  
368 the composition of root-associated fungal communities (Fig. 5).

369 Paleontological and phylogenomic studies established the ancestral origin of genetic signatures  
370 enabling AM symbiosis in land plants [1,48]. In monocots and dicots, the extended AM fungal  
371 network is primarily recognized as a provider of nutrients, particularly phosphorus [49,50], but the  
372 positive impact of AM symbiosis on the host transcends nutrient acquisition [51]. Additionally,  
373 phylogenomic studies of the symbiotic phosphate transporter PT4 suggest that this trait evolved  
374 late and therefore that phosphorus acquisition might not have been the (only) driving force for the  
375 emergence of AM symbiosis [48]. *SymRK* and *Ram1* were identified in the genomes of liverworts,  
376 but evolution of *CCaMK* predated the emergence of all land plants, as shown by its presence and  
377 conserved biochemical function in advanced charophytes [48]. Together, these findings raise  
378 questions regarding the forces driving the evolution of signaling genes enabling intracellular  
379 symbioses in land plants. Our study shows that in *L. japonicus*, simultaneous impairment of AM  
380 and RN symbioses in *symRK-3* and *ccamk-13* plants had a dramatic effect on the composition of  
381 both bacterial and fungal communities of the legume root microbiota (Fig. 5). Importantly, mutation  
382 of *CcamK* and *SymrK* led to an almost complete depletion of a large number of fungal OTUs,  
383 mostly belonging to Glomeromycota, indicating that in *Lotus*, these genes predominantly control

384 the colonization of roots by this particular fungal lineage. The finding that *ram1-2* mutants show  
385 retained accommodation for a subset of fungal root endophytes (n=13; Fig. 5B, and Fig 4B) whose  
386 colonization is dependent on an intact common symbiosis pathway is not surprising based on the  
387 capacity of these mutants to enable fungal colonization but not to sustain a full symbiotic  
388 association [26], and indicates that *RAM1* is dispensable for the intraradical colonization of these  
389 Glomeromycota fungi. Alternatively, these fungal root endophytes may engage in commensal  
390 rather than mutualistic relationships with *L. japonicus* independently of the AM symbiosis pathway  
391 as is the case for multiple species of commensal non-symbiotic rhizobia [22,52]. For instance,  
392 given that *ram1-2* mutants specifically block AM arbuscule differentiation but not root colonisation  
393 [26], it is conceivable that the Glomeromycota taxa colonizing this plant genotype may not form  
394 arbuscules during root colonization.

395 Legumes have evolved the capacity to recognize and accommodate both types of intracellular  
396 symbionts, and the large effect of CSSP genes on associated microbiota seen in the present work  
397 could reflect a legume-specific trait. However, in rice, which does not engage in symbiotic  
398 relationships with nodulating rhizobia, mutants lacking *CCaMK* were also found to display  
399 significant changes in root-associated bacterial communities that could be mainly explained by  
400 depletion of Rhizobiales and Sphingomonadales lineages [53]. Thus, our findings based on  
401 comparative microbiota analysis of *Lotus ccamk* and *ram1* mutants suggest a broader role for  
402 common symbiosis signaling genes in microbiota assembly. Future studies on orthologous genes  
403 in basal land plants will contribute to a better understanding of the role of symbiotic signaling in the  
404 evolution of plant-microbiota associations.

405

406 **Acknowledgements**

407 This work was supported by funds to S. R. from The Danish National Research Foundation (Grant  
408 no. DNRF79), by funds to P.S.-L. from the Max Planck Society, a European Research Council  
409 advanced grant (ROOTMICROBIOTA), the 'Cluster of Excellence on Plant Sciences' program  
410 funded by the Deutsche Forschungsgemeinschaft (DFG), and SPP 2125 DECRyPT from the DFG.

411 **Conflict of interest**

412 The authors declare no conflict of interests.

413 **Data availability**

414 All sequencing reads will be uploaded to the European Nucleotide Archive (ENA). Code and  
415 relevant data files (e.g. OTU tables) will be made public via GitHub.

416

417

418 **References**

- 419 1. Remy W, Taylor TN, Hass H, Kerp H. Four hundred-million year-old vesicular arbuscular  
420 mycorrhizae. *Proc Natl Acad Sci USA* 1994; 11:841–11.
- 421 2. Taylor TN, Remy W, Hass H, Kerp H. Fossil Arbuscular Mycorrhizae from the Early Devonian.  
422 *Mycologia* 1995; 87(4):560-573.
- 423 3. Pirozynski KA, Malloch DW. The origin of land plants: a matter of mycotrophism. *Biosystems*  
424 1975; 6:153-164.
- 425 4. Smith SE, Read D J, Vesicular-arbuscular mycorrhizas in agriculture and horticulture. In  
426 *Mycorrhizal Symbiosis*. Academic press, 1997. (pp. 453-469).
- 427 5. Wang B, Qiu YL. Phylogenetic distribution and evolution of mycorrhizas in land plants.  
428 *Mycorrhiza* 2006; 16(5):299-363.
- 429 6. Bonfante P, Genre A. Mechanisms underlying beneficial plant-fungus interactions in mycorrhizal  
430 symbiosis. *Nat Commun* 2010; 1:48.
- 431 7. Stracke S, Kistner C, Yoshida S, Mulder L, Sato S, Kaneko T, et al. A plant receptor-like kinase  
432 required for both bacterial and fungal symbiosis. *Nature* 2002; 417(6892):959-62
- 433 8. Antolin-Llovera M, Ried MK, Parniske M. Cleavage of the SYMBIOSIS RECEPTOR-LIKE  
434 KINASE ectodomain promotes complex formation with Nod factor receptor 5. *Curr Biol* 2014;  
435 24(4):422-427.
- 436 9. Charpentier M, Bredemeier R, Wanner G, Takeda N, Schleiff E, Parniske M. Lotus japonicus  
437 CASTOR and POLLUX are ion channels essential for perinuclear calcium spiking in legume root  
438 endosymbiosis. *Plant Cell* 2008; 20(12).
- 439 10. Ane JM, Kiss GB, Riely BK, Penmetsa RV, Oldroyd GE, Ayax C. Medicago truncatula DMI1  
440 required for bacterial and fungal symbioses in legumes. *Science* 2004; 303(5662):1364-1367.
- 441 11. Kanamori N, Madsen LH, Radutoiu S, Frantescu M, Quistgaard EM, Miwa H. A nucleoporin is  
442 required for induction of Ca<sup>2+</sup> spiking in legume nodule development and essential for rhizobial  
443 and fungal symbiosis. *Proc Natl Acad Sci USA* 2006; 103(2):59-364
- 444 12. Saito K, Yoshikawa M, Yano K, Miwa H, Uchida H, Asamizu E. NUCLEOPORIN85 is  
445 required for calcium spiking, fungal and bacterial symbioses, and seed production in Lotus  
446 japonicus. *Plant Cell* 2007; 19(2):610-624
- 447 13. Groth M, Takeda N, Perry J, Uchida H, Draxl S, Brachmann A. NENA, a Lotus japonicus  
448 homolog of Sec13, is required for rhizodermal infection by arbuscular mycorrhiza fungi and  
449 rhizobia but dispensable for cortical endosymbiotic development. *Plant Cell* 2010; 22(7):2509-  
450 2526.

451



- 452 14. Charpentier M, Sun J, Vaz Martins T, Radhakrishnan GV, Findlay K, Soumpourou E. Nuclear-  
453 localized cyclic nucleotide-gated channels mediate symbiotic calcium oscillations. *Science* 2016;  
454 352(6289):1102-1105.
- 455 15. Levy J, Bres C, Geurts R, Chalhoub B, Kulikova O, Duc G. A putative Ca<sup>2+</sup> and calmodulin-  
456 dependent protein kinase required for bacterial and fungal symbioses. *Science* 2004;  
457 303(5662):1361-1364.
- 458 16. Mitra RM, Gleason CA, Edwards A, Hadfield J, Downie JA, Oldroyd GE, et al. A  
459 Ca<sup>2+</sup>/calmodulin-dependent protein kinase required for symbiotic nodule development: Gene  
460 identification by transcript-based cloning. *Proc Natl Acad Sci U S A* 2004; 101(13):4701-5.
- 461 17. Yano K, Yoshida S, Muller J, Singh S, Banba M, Vickers K. et al. CYCLOPS, a mediator of  
462 symbiotic intracellular accommodation. *Proc Natl Acad Sci U S A* 2008; 105(51):20540-20545.
- 463 18. Singh S, Katzer K, Lambert J, Cerri M, Parniske M. CYCLOPS, a DNA-binding transcriptional  
464 activator, orchestrates symbiotic root nodule development. *Cell Host Microbe* 2014; 15(2):139-152.
- 465 19. Messinese E, Mun JH, Yeun LH, Jayaraman, D, Rouge P, Barre, A, et al. A novel nuclear  
466 protein interacts with the symbiotic DMI3 calcium- and calmodulin-dependent protein kinase of  
467 *Medicago truncatula*. *Mol Plant Microbe Interact* 2007; 20(8):912-921.
- 468 20. Udvardi M, Poole PS. Transport and metabolism in legume-rhizobia symbioses. *Annu Rev Plant*  
469 *Biol* 2013; 64:781-805.
- 470 21. Gutjahr C, Sawers RJH, Marti G, Andres-Hernandez L, Yang S, Casieri L. Transcriptome  
471 diversity among rice root types during asymbiosis and interaction with arbuscular mycorrhizal  
472 fungi. *Proc Natl Acad Sci USA* 2015; 112(21):6754.
- 473 22. Zgadzaj R, Garrido-Oter R, Jensen DB, Koprivova A, Schulze-Lefert P, Radutoiu S. Root  
474 nodule symbiosis in *Lotus japonicus* drives the establishment of distinctive rhizosphere, root, and  
475 nodule bacterial communities. *Proc Natl Acad Sci U S A* 2016; 113(49):E7996-E8005.
- 476 23. Johnson D, Gilbert L. Interplant signalling through hyphal networks. *New Phytol* 2014;  
477 205(4):1448-53.
- 478 24. Hassani MA, Duran, P, Hacquard S. Microbial interactions within the plant holobiont.  
479 *Microbiome* 2018; 6(1):58.
- 480 25. Madsen EB, Madsen, LH, Radutoiu S, Olbryt M, Rakwalska M, Szczyglowski K, et al. A  
481 receptor kinase gene of the LysM type is involved in legume perception of rhizobial signals. *Nature*  
482 2003; 425(6958):637.
- 483 26. Xue L, Cui H, Buer B, Vijayakumar V, Delaux PM, Junkermann S, et al. Network of GRAS  
484 transcription factors involved in the control of arbuscule development in *Lotus japonicus*. *Plant*  
485 *Physiol* 2015; 167(3):854-871.

486

- 487 27. Perry J, Brachmann A, Welham T, Binder A, Charpentier M, Groth M, et al. TILLING in *Lotus*  
488 *japonicus* identified large allelic series for symbiosis genes and revealed a bias in functionally  
489 defective ethyl methanesulfonate alleles toward glycine replacements. *Plant Physiol* 2009; 151:  
490 1281–1291.
- 491 28. Schlaeppli K, Dombrowski N, Oter RG, Ver Loren van Themaat E, Schulze-Lefert P.  
492 Quantitative divergence of the bacterial root microbiota in *Arabidopsis thaliana* relatives. *Proc Natl*  
493 *Acad Sci U S A* 2014; 111(2):585-92.
- 494 29. Ihrmark K, Bödeker IT, Cruz-Martinez K, Friberg H, Kubartova A, Schenck J, et al. New  
495 primers to amplify the fungal ITS2 region--evaluation by 454-sequencing of artificial and natural  
496 communities. *FEMS Microbiol Ecol* 2012; 82(3):666-77.
- 497 30. White TJ, Bruns TD, Lee SB, Taylor JW. Amplification and direct sequencing of fungal  
498 ribosomal RNA genes for phylogenetics. In: Innis MA, Gelfand DH, Sninsky JJ, White TJ, editors.  
499 *PCR protocols: a guide to methods and applications*. United States: Academic Press, CA, USA,  
500 1990, pp. 315-322.
- 501 31. Duran, P., Thierygart T, Garrido-Oter R, Agler M, Kemen E, Schulze-Lefert P, et al. (2018).  
502 Microbial interkingdom interactions in roots promote *Arabidopsis* survival. *Cell* 2018; 175(4):973-  
503 983.
- 504 32. Caporaso JG, Kuczynski J, Stombaugh J, Bittinger K, Bushman FD, Costello EK, et al. QIIME  
505 allows analysis of high-throughput community sequencing data. *Nat Methods* 2010; 7:335-336.
- 506 33. Edgar RC. UPPARSE: highly accurate OTU sequences from microbial amplicon reads. *Nat*  
507 *Methods* 2013; 10:996-998.
- 508 34. DeSantis TZ, Hugenholtz P, Larsen N, Rojas M, Brodie EL, Keller K, et al. Greengenes, a  
509 chimera-checked 16S rRNA gene database and workbench compatible with ARB. *Appl Environ*  
510 *Microbiol* 2006; 72:5069-5072
- 511 35. Bengtsson-Palme J, Ryberg M, Hartmann M, Branco S, Wang Z, Godhe A, De Wit P, et al.  
512 Improved software detection and extraction of ITS1 and ITS2 from ribosomal ITS sequences of  
513 fungi and other eukaryotes for analysis of environmental sequencing data. *Methods Ecol Evol* 2013;  
514 4: 914-919.
- 515 36. Wang Q, Garrity GM, Tiedje JM, Cole JR. Naive Bayesian classifier for rapid assignment of  
516 rRNA sequences into the new bacterial taxonomy. *Appl Environ Microb* 2007; 73:5261-5267.
- 517 37. Paulson, JN, Stine, OC, Bravo HC, Pop M. Differential abundance analysis for microbial  
518 marker-gene surveys. *Nat Methods* 2013; 10:1200-1202.
- 519 38. Chabaud M, Genre A, Sieberer BJ, Faccio A, Fournier J, Novero M, et al. Arbuscular  
520 mycorrhizal hyphopodia and germinated spore exudates trigger Ca<sup>2+</sup> spiking in the legume and  
521 nonlegume root epidermis. *New Phytol* 2011; 189(1):347-5.

522

- 523 39. Miwa H, Sun J, Oldroyd GE, Downie JA. Analysis of calcium spiking using a cameleon  
524 calcium sensor reveals that nodulation gene expression is regulated by calcium spike number and  
525 the developmental status of the cell. *Plant J* 2006; 48(6):883-94.
- 526 40. Bulgarelli D, Rott M, Schlaeppi K, Emiel Ver Loren van Themaat E, Ahmadinejad N, Assenza  
527 F, et al. Revealing structure and assembly cues for Arabidopsis root-inhabiting bacterial microbiota.  
528 *Nature* 2012; 488:91-95.
- 529 41. Anderson MJ, Willis TJ, Canonical analysis of principal coordinates: A useful method of  
530 constrained ordination for ecology. *Ecology* 2003; 84(2):511-525.
- 531 42. Lombard L, van der Merwe NA, Groenewald JZ, Crous PW. Generic concepts in Nectriaceae.  
532 *Stud Mycol* 2015; 80:189-245.
- 533 43. Lofgren LA, LeBlanc NR, Certano AK, Nachtigall J, LaBine KM, Riddle J, et al. Fusarium  
534 graminearum: pathogen or endophyte of North American grasses? *New Phytol* 2018; 217(3):1203-  
535 1212.
- 536 44. Amselem J, Cuomo CA, van Kan, JA, Viaud M, Benito EP, Couloux A, et al. Genomic analysis  
537 of the necrotrophic fungal pathogens *Sclerotinia sclerotiorum* and *Botrytis cinerea*. *PLoS Genet*  
538 2011; 7(8).
- 539 45. Almario J, Jeena G, Wunder J, Langen G, Zuccaro A, Coupland G, Bucher M. Root-associated  
540 fungal microbiota of nonmycorrhizal *Arabidopsis thaliana* and its contribution to plant phosphorus  
541 nutrition. *Proc Natl Acad Sci U S A* 2017; 114(44):E9403-E9412.
- 542 46. Desiro A, Salvioli A, Ngonkeu EL, Mondo SJ, Epis S, Faccio A, et al. Detection of a novel  
543 intracellular microbiome hosted in arbuscular mycorrhizal fungi. *ISME J* 2014; 8(2): 257-270.
- 544 47. Bianciotto V, Lumini E, Lanfranco L, Minerdi D, Bonfante P, Perotto S. Detection and  
545 identification of bacterial endosymbionts in arbuscular mycorrhizal fungi belonging to the family  
546 Gigasporaceae. *Appl Environ Microbiol* 2000;66(10):4503-4509.
- 547 48. Delaux PM, Radhakrishnan GV, Jayaraman D, Cheema J, Malbreil M, Volkening JD, et al.  
548 Algal ancestor of land plants was preadapted for symbiosis. *Proc Natl Acad Sci U S A* 2015;  
549 112(43):13390-13395.
- 550 49. Javot H, Penmetsa RV, Terzaghi N, Cook DR, Harrison MJ. A *Medicago truncatula* phosphate  
551 transporter indispensable for the arbuscular mycorrhizal symbiosis. *Proc Natl Acad Sci U S A* 2007;  
552 104(5):1720-5.  
553
- 554 50. Sawers RJ, Svane SF, Quan C, Grønlund M, Wozniak B, Gebreselassie MN, et al. Phosphorus  
555 acquisition efficiency in arbuscular mycorrhizal maize is correlated with the abundance of root-  
556 external hyphae and the accumulation of transcripts encoding PHT1 phosphate transporters. *New*  
557 *Phytol* 2017; 214(2):632-643.  
558
- 559 51. Chen M, Arato M, Borghi L, Nouri E, Reinhardt D. Beneficial Services of Arbuscular  
560 Mycorrhizal Fungi - From Ecology to Application. *Front Plant Sci* 2018; 9:1270.

561

562 52. Garrido-Oter R, Nakano RT, Dombrowski N, Ma KW, AgBiome T, McHardy AC, et al.  
563 Modular Traits of the Rhizobiales Root Microbiota and Their Evolutionary Relationship with  
564 Symbiotic Rhizobia. *Cell Host Microbe* 2018; 24(1):155-167 e155.

565 53. Ikeda S, Okubo T, Takeda N, Banba M, Sasaki K, Imaizumi-Anraku H, et al. The genotype of  
566 the calcium/calmodulin-dependent protein kinase gene (CCaMK) determines bacterial community  
567 diversity in rice roots under paddy and upland field conditions. *Appl Environ Microbiol* 2011;  
568 77(13):4399-4405.

569

570

571

572

573

574

575

576

577

578

579

580

581

582

583

584

585

586

587

588 **Main Figures**

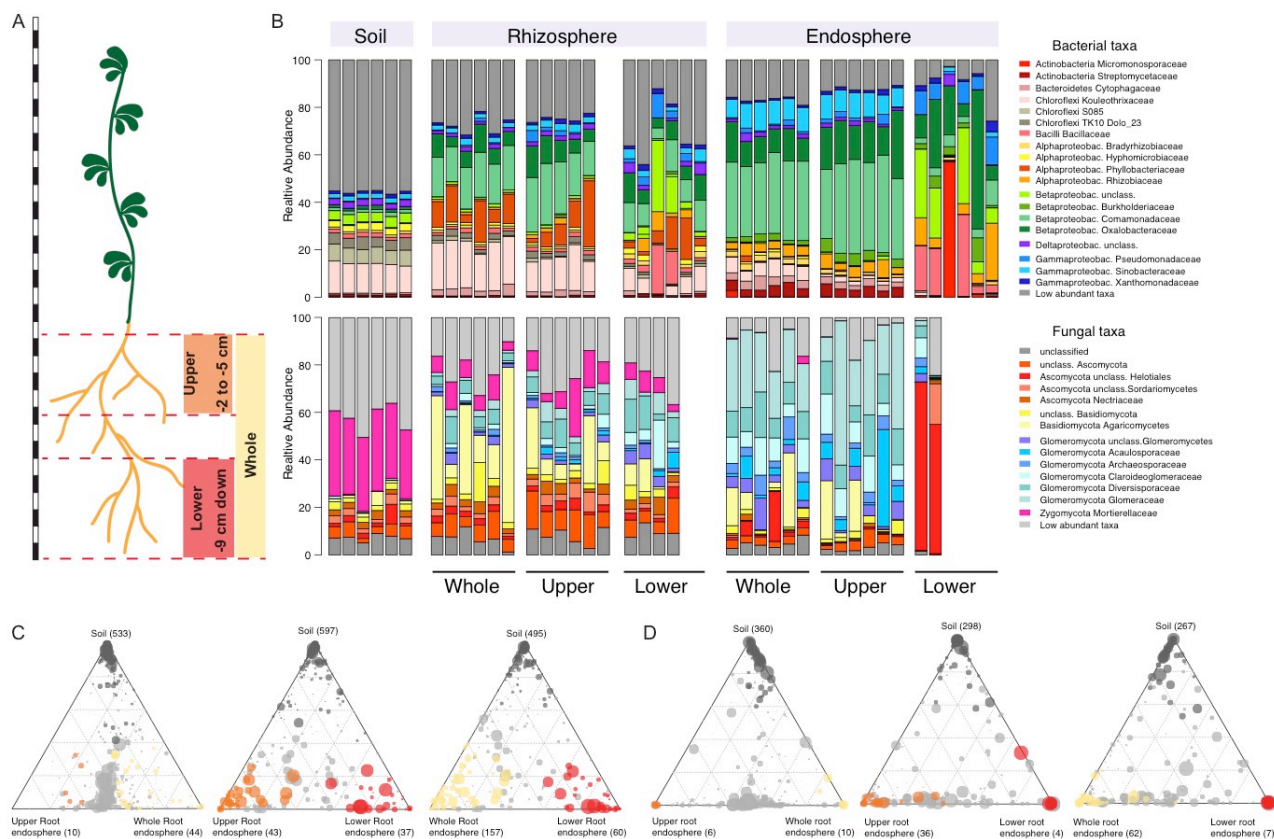

589

590

591 **Fig1, Bacterial & fungal community profile for different root fractions of *L. japonicus*.**

592 A) Cartoon showing the length of the three different root fractions. B) Community profile showing  
 593 the relative abundance of bacterial (upper panel) and fungal (lower panel) families across  
 594 compartments and fractions (only samples with >5000 (bacteria) or >1000 (fungi) reads are shown,  
 595 taxa having average RA < 0.1 (bacteria) or <0.15 (fungi) across all samples are aggregated as low-  
 596 abundant.). C) Ternary plots showing bacterial OTUs that are enriched in the endosphere of specific  
 597 root fractions, compared to the soil samples. B) Ternary plots showing fungal OTUs that are  
 598 enriched in the endosphere of specific root fractions, compared to the soil samples. Circle size  
 599 corresponds to RA across all fractions. Dark grey circles denote OTUs that are enriched in soil,  
 600 light grey circles always represent OTUs that are not enriched in any of the fractions.

601

602

603

604

605

606

607

608

609

610

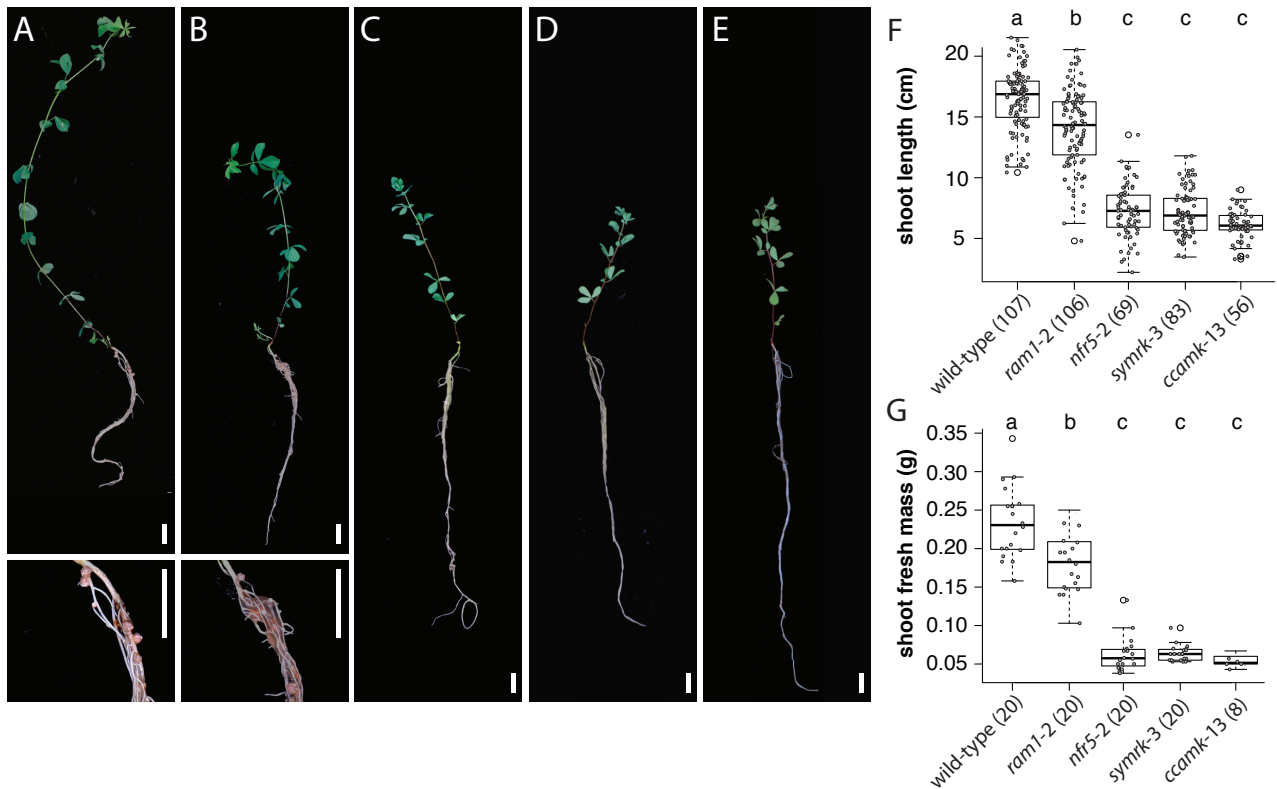

611  
612  
613  
614  
615  
616  
617  
618  
619  
620  
621  
622  
623  
624  
625  
626  
627  
628  
629  
630  
631  
632  
633  
634  
635  
636  
637

**Fig2, Phenotypes of WT and mutant plants.** Images depicting *L. japonicus* wild-type (A) and symbiosis-deficient mutant plants: *ram1-2* (B), *nfr5-2* (C), *symRK-3* (D) and *ccamk-13* (E). Insets show close-up view of nodules. Scale bars correspond to 1 cm. F) Boxplots display the shoot length for the identical set of genotypes presented in (A-E). G) Boxplots displaying the shoot fresh mass. Letters above plots correspond to groups based on Tukey's HSD test (P<0.05). Number of samples are indicated in brackets.

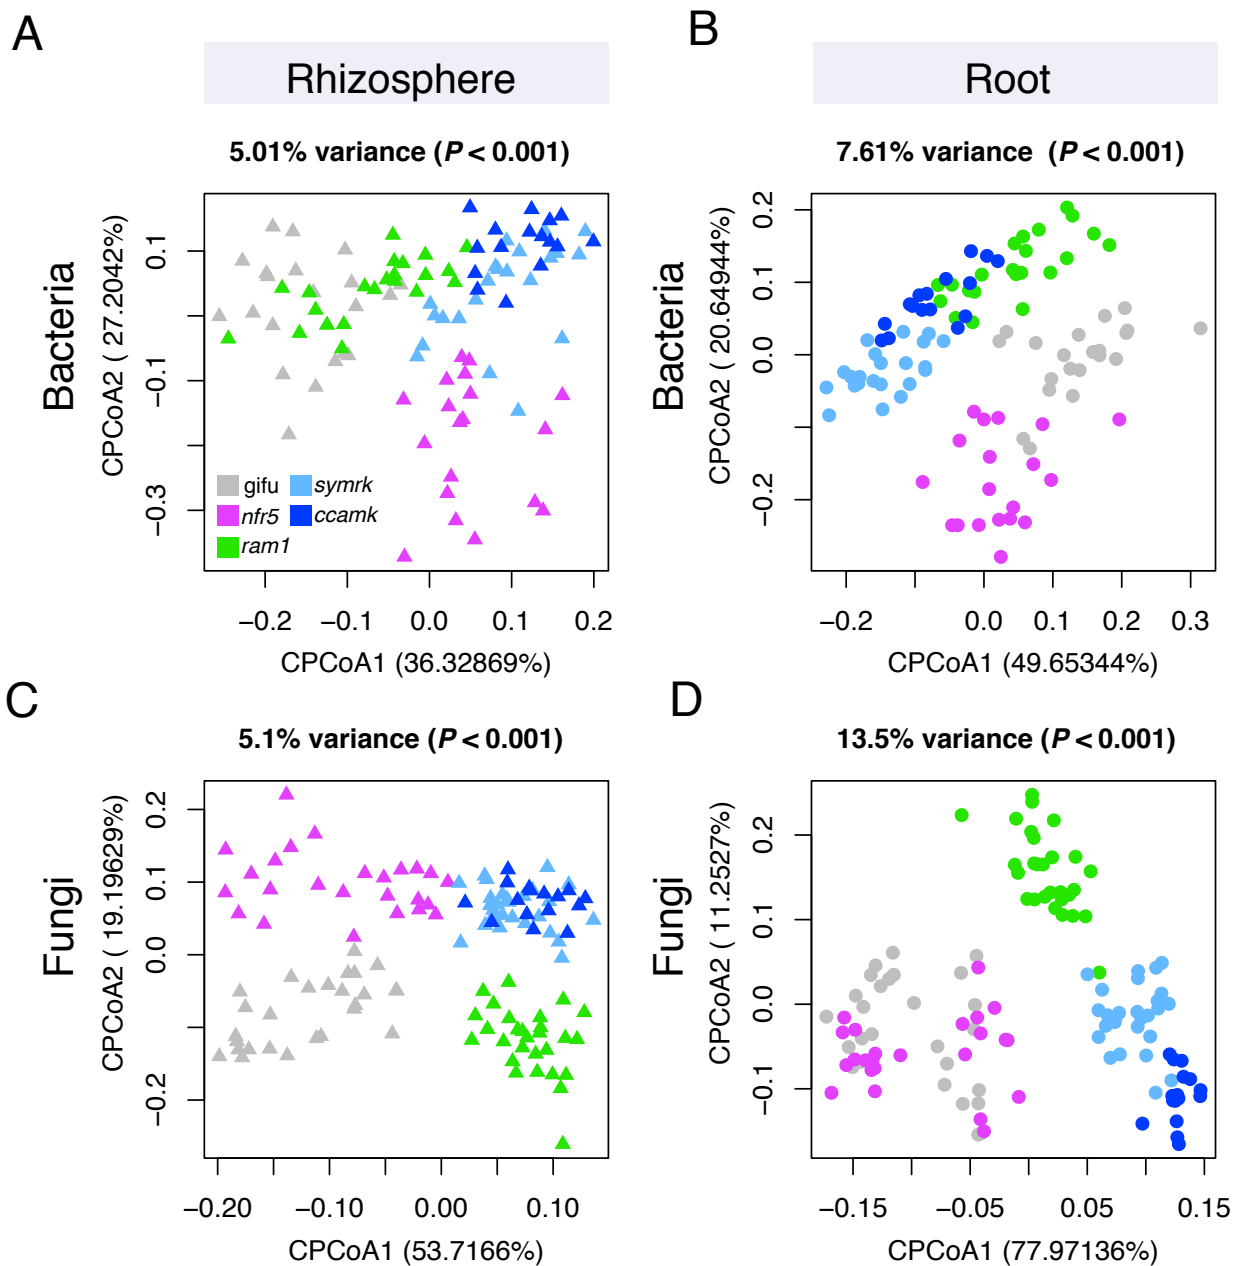

638  
639  
640  
641  
642  
643  
644  
645  
646  
647  
648  
649  
650

**Fig3, Constrained PCoA analysis showing genotype effect on microbial communities.**

A) Constrained PCoA plots for bacterial datasets showing rhizosphere samples ( $n = 100$ ) and B) root samples ( $n = 100$ ). C) Constrained PCoA plots for fungal datasets showing only rhizosphere samples ( $n = 124$ ) and D) root samples ( $n = 122$ ).

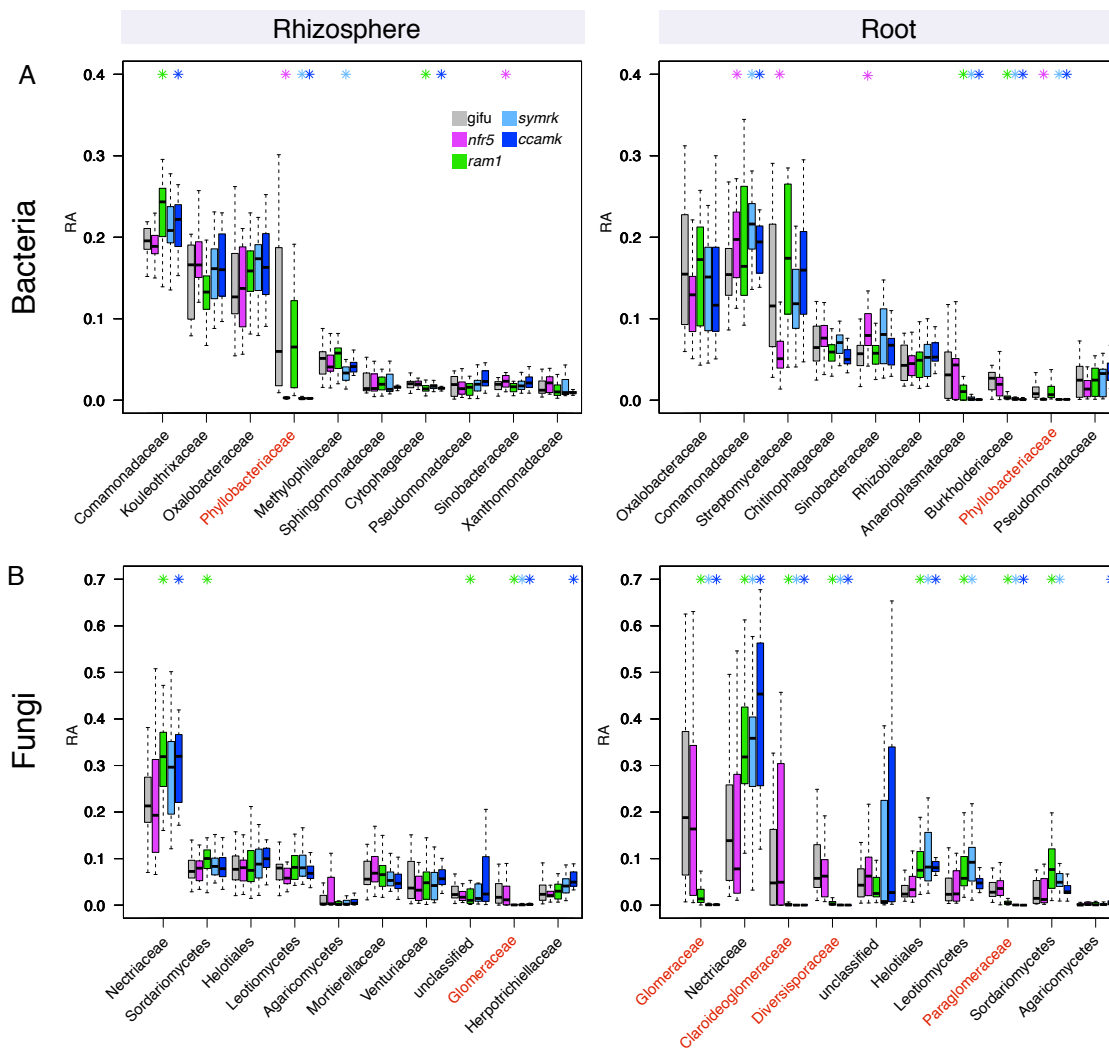

651

652

653 **Fig4, Relative abundance for main microbial taxa across plant compartments and genotypes.**

654 A) RA for bacterial families in rhizosphere (left panel) and root compartment (right panel). B) RA

655 for fungal families in rhizosphere (left panel) and root compartment (right panel). Taxa are sorted in

656 decreasing order according to their average RA in wt plants (only first 10 most abundant

657 taxonomical groups are shown). RA in wt as well as in the respective mutants is displayed.

658 Significant differences compared to wt are marked with an asterisk in the color of the mutant

659 ( $P < 0.05$ , Kruskal-Wallis test). Families that include known symbionts are marked in red

660 (Phyllobacteriaceae for bacteria and Glomeromyces for Fungi). For some fungal taxa the next

661 higher rank is shown, when no family level information was available.

662

663

664

665

666

667

668

669

670



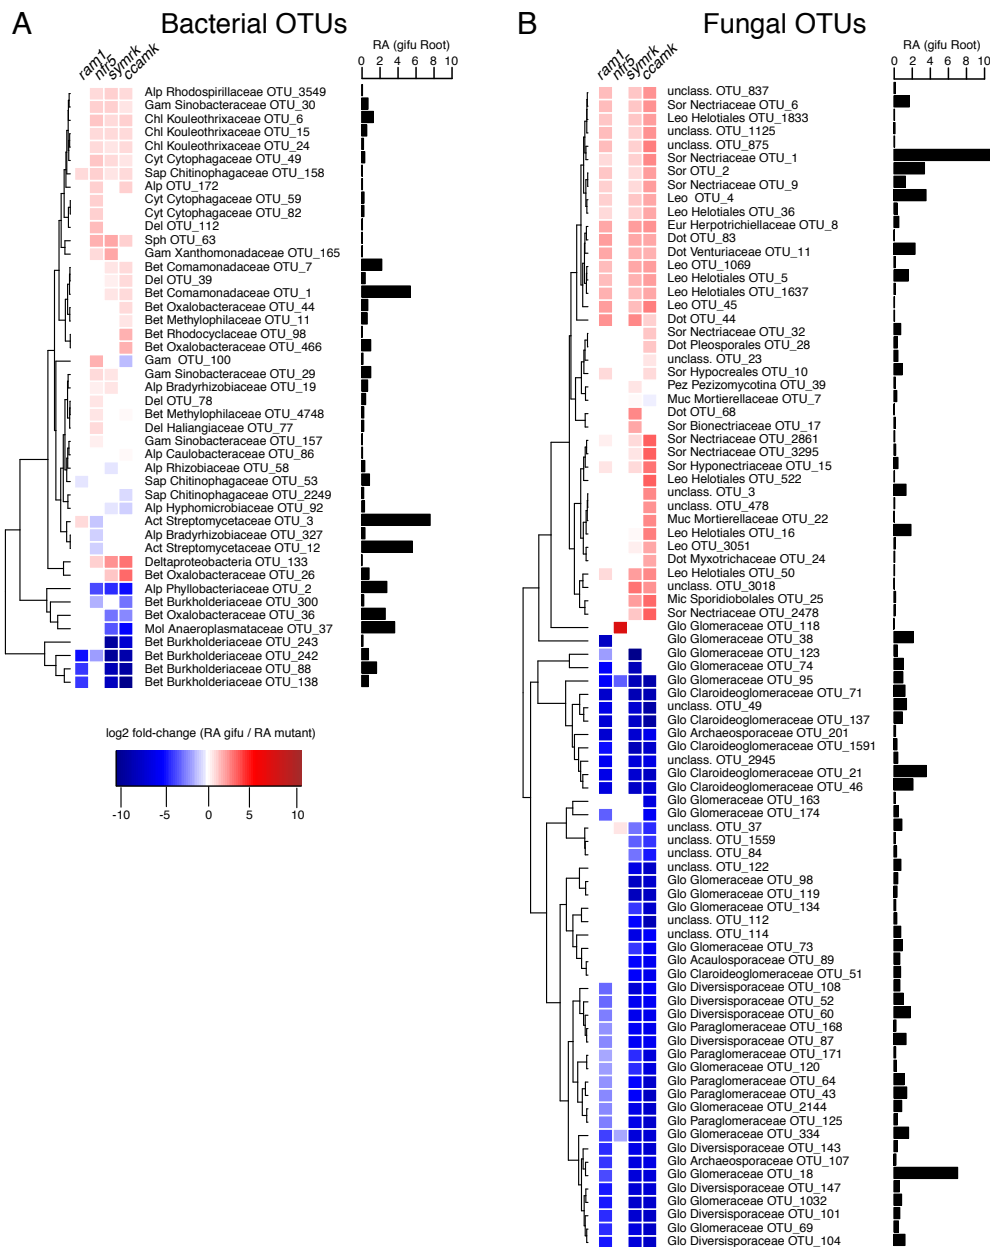

671  
672  
673  
674  
675  
676  
677  
678  
679  
680  
681  
682  
683  
684

**Fig5, Differential abundance analysis for root associated OTUs.**

A) Bacterial OTUs that are differentially abundant in the roots of mutants compared to wt roots. B) fungal OTUs that are differentially abundant in the roots of mutants compared to wt roots. Only OTUs that have an average RA > 0.1% across all root samples, including mutants, are considered here. For each OTU the fold change in RA from wt to mutant is indicated (P < 0.05, Kruskal-Wallis test). Next to each OTU the RA in wt roots is indicated. Phylum and family association (if available) is given for each OTU (Bacterial phyla: Del=Deltaproteobacteria, Gem=Gemm-1, Chl=Chloroflexi, Bet=Betaproteobacteria, Alp=Alphaproteobacteria, Gam=Gammaproteobacteria, Cyt=Cytophagia, Sap=Saprosiprae, Ped=Pedosphaerae, Sph= Sphingobacteria, Mol= Mollicutes; Fungal phyla: Sor=Sordariomycetes, Dot=Dothideomycetes, Mic= Microbotryomycetes, Ust=Ustilaginomycetes, Eur=eurotiomycetes, Leo=Leotiomycetes, Aga=Agaricomycetes, Glo=Glomeromycetes, Pez=Pezizomycota, Muc=Mucoromycotina).

685 **Supplementary Figures**  
686

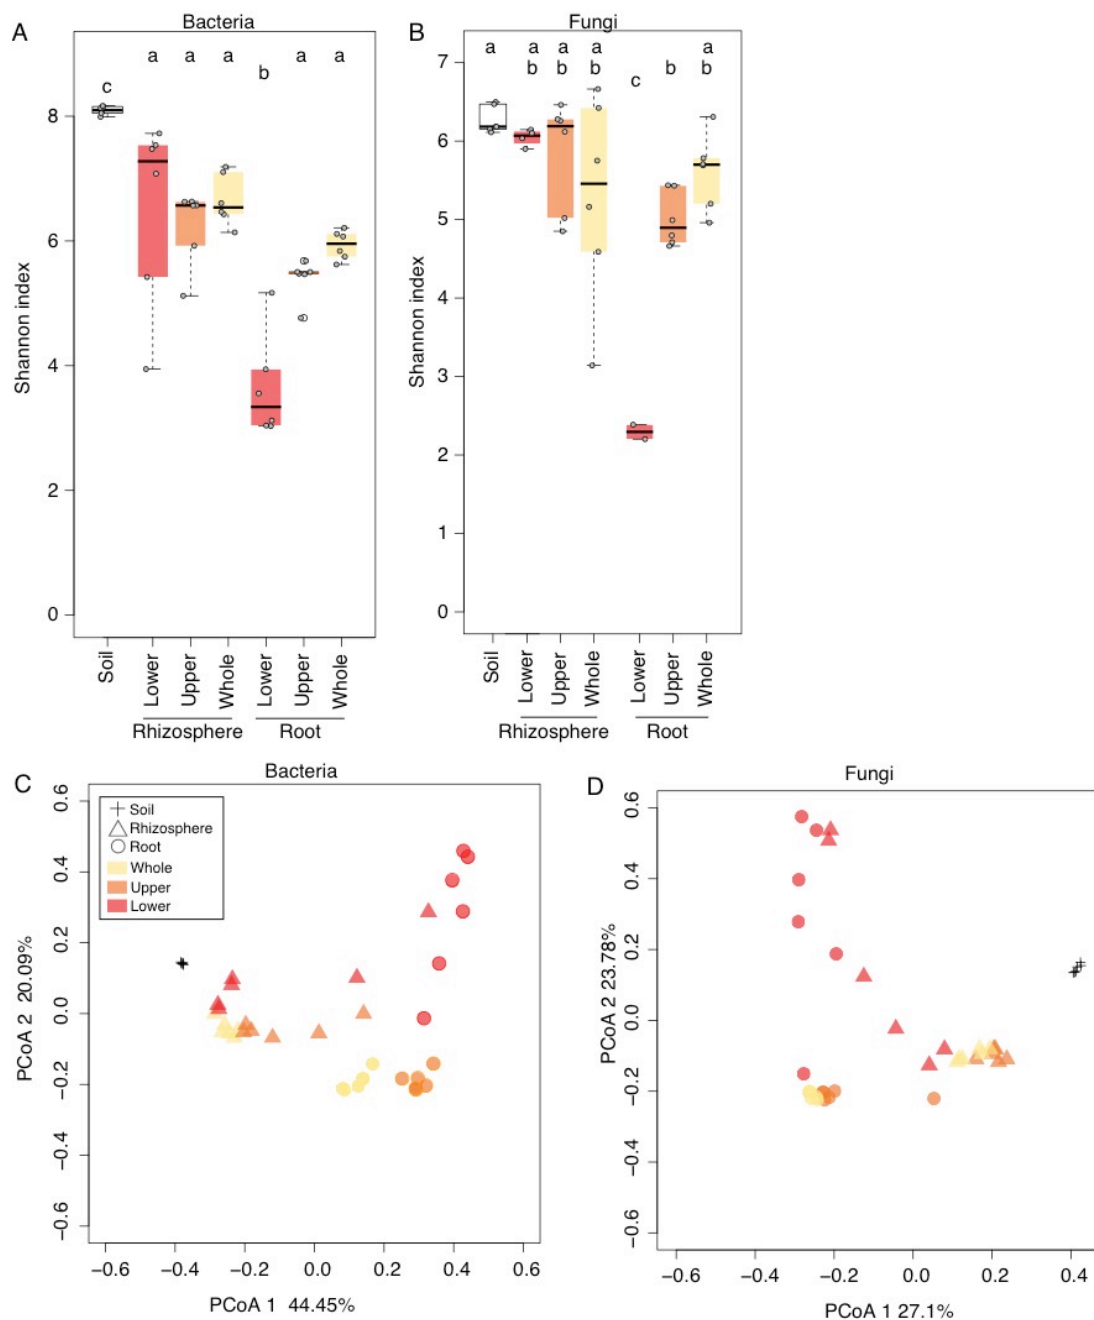

687  
688  
689  
690  
691  
692  
693  
694  
695  
696  
697

**Supp Fig1, Alpha and beta diversity across root fractions.**

A) Shannon diversity index for 16S amplicon data, soil (n=6), lower (n=6), upper (n=6), whole root fractions (n=6), and respective rhizosphere samples (n=6 each) B) Shannon diversity index for ITS2 amplicon data, soil (n=6), lower (n=2), upper (n=6), whole root fractions (n=6), and respective rhizosphere samples (n=6 each, except lower, n=4) (ANOVA with Tukey's post hoc test,  $P < 0.05$ ). C) Principal coordinate analysis of Bray-Curtis distances for bacterial data. D) Principal coordinate analysis of Bray-Curtis distances for fungal data.

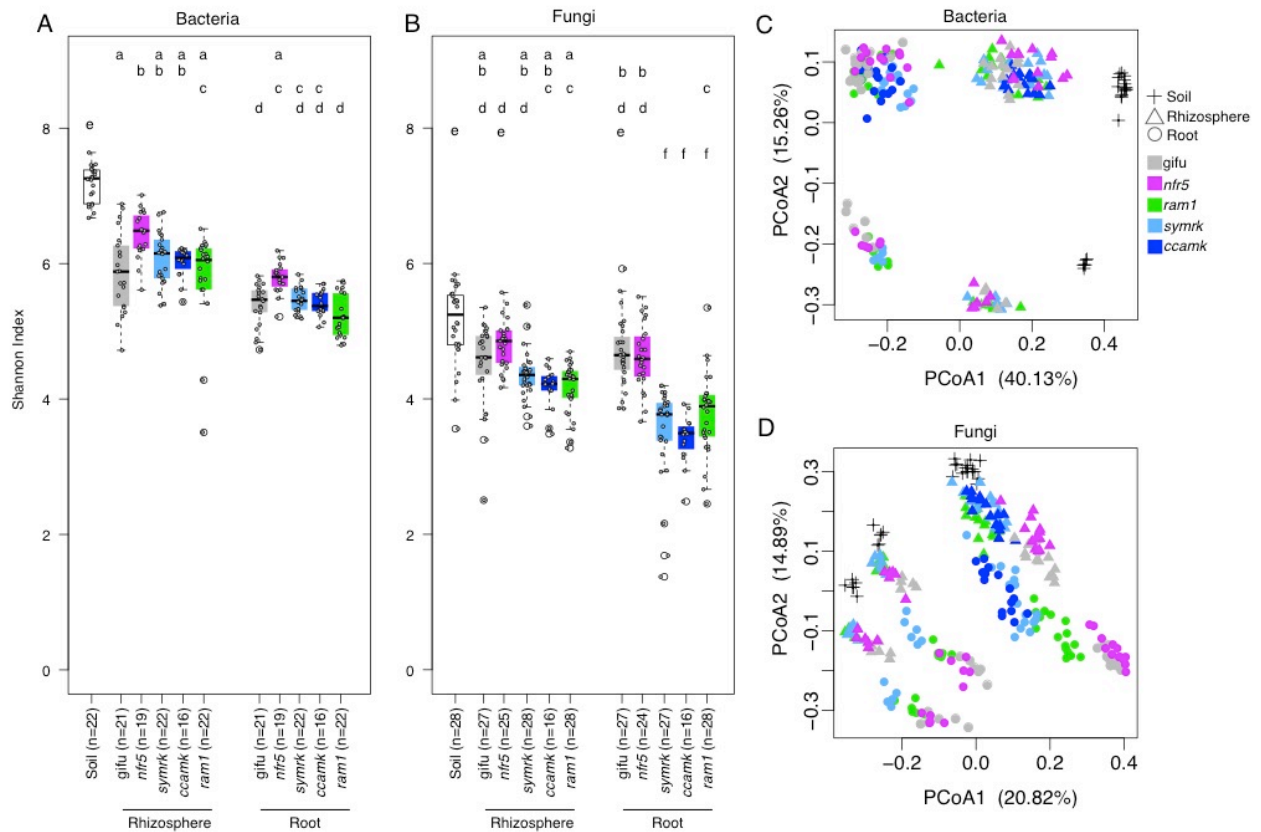

698  
699  
700  
701  
702  
703  
704  
705  
706  
707  
708  
709  
710  
711  
712  
713  
714  
715  
716  
717  
718  
719  
720  
721  
722  
723

**Supp Fig2, Alpha and beta diversity across plant compartments and genotypes.**

A) Shannon diversity indices for the bacterial (16S amplicon) dataset. B) Shannon diversity indices for the fungal (ITS2 amplicon) dataset (ANOVA with Tukey's post hoc test,  $P < 0.05$ ) C) Principal coordinate analysis of Bray-Curtis distances for the bacterial dataset ( $n=222$ ). D) Principal coordinate analysis of Bray-Curtis distances for the fungal dataset ( $n=274$ ).

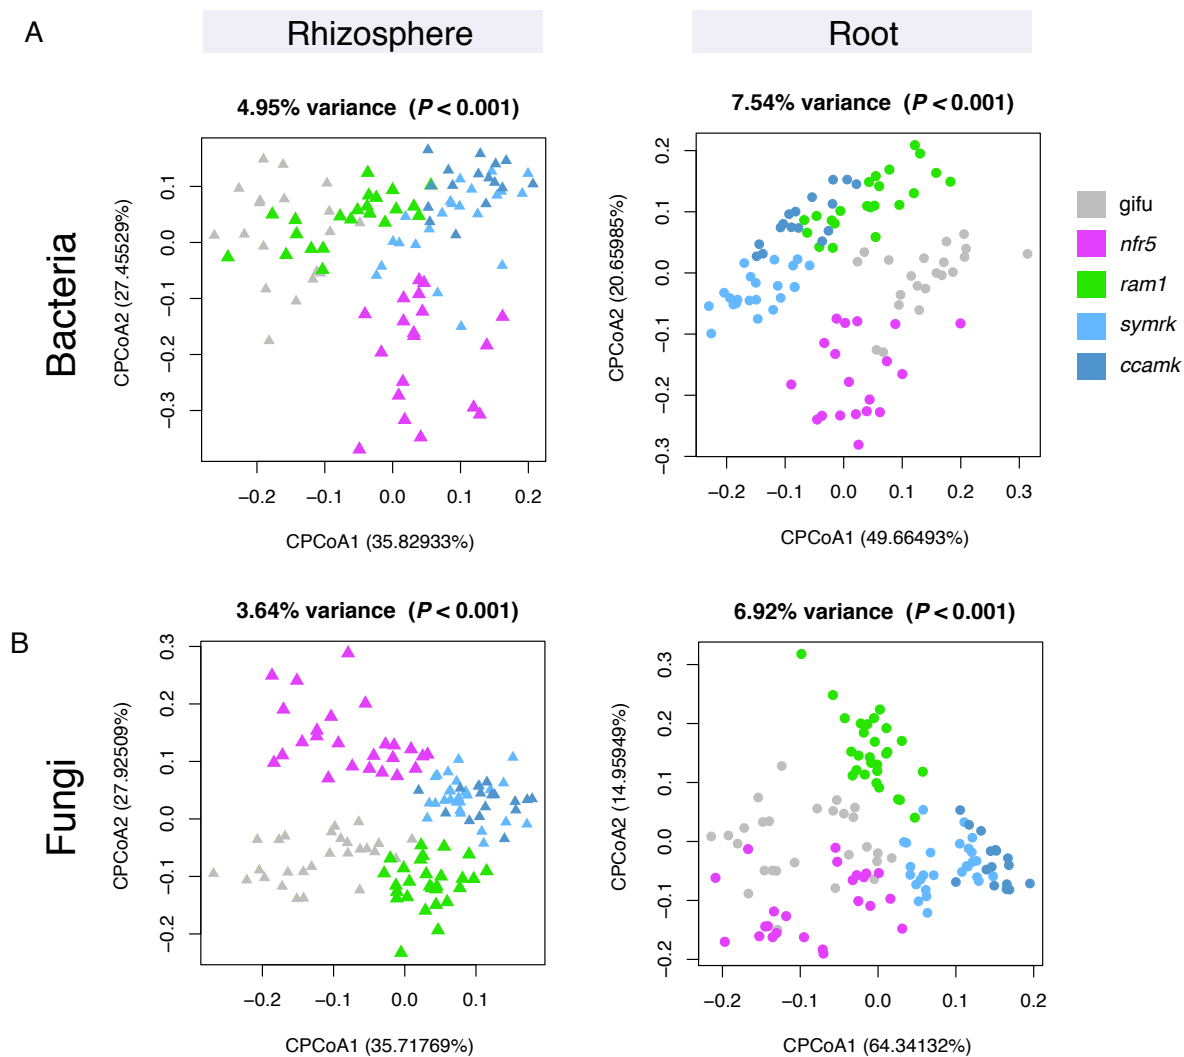

724

725

726

727

728

729

730

731

732

733

734

735

736

737

738

739

740

741

742

743

**Supp Fig3, CPCoA, showing the same results as Fig3, but without known symbionts.** Results are separated by compartments. Datasets were constrained by genotype, and filtered for effects of experiments and soil type. A) Bacterial dataset from which OTUs belonging to the Phyllobacteriaceae were removed before analysis (root n=100, rhizosphere n=100). B) Fungal dataset from which OTUs belonging to the Glomeromycota were removed before analysis (root n=122, rhizosphere n=124).

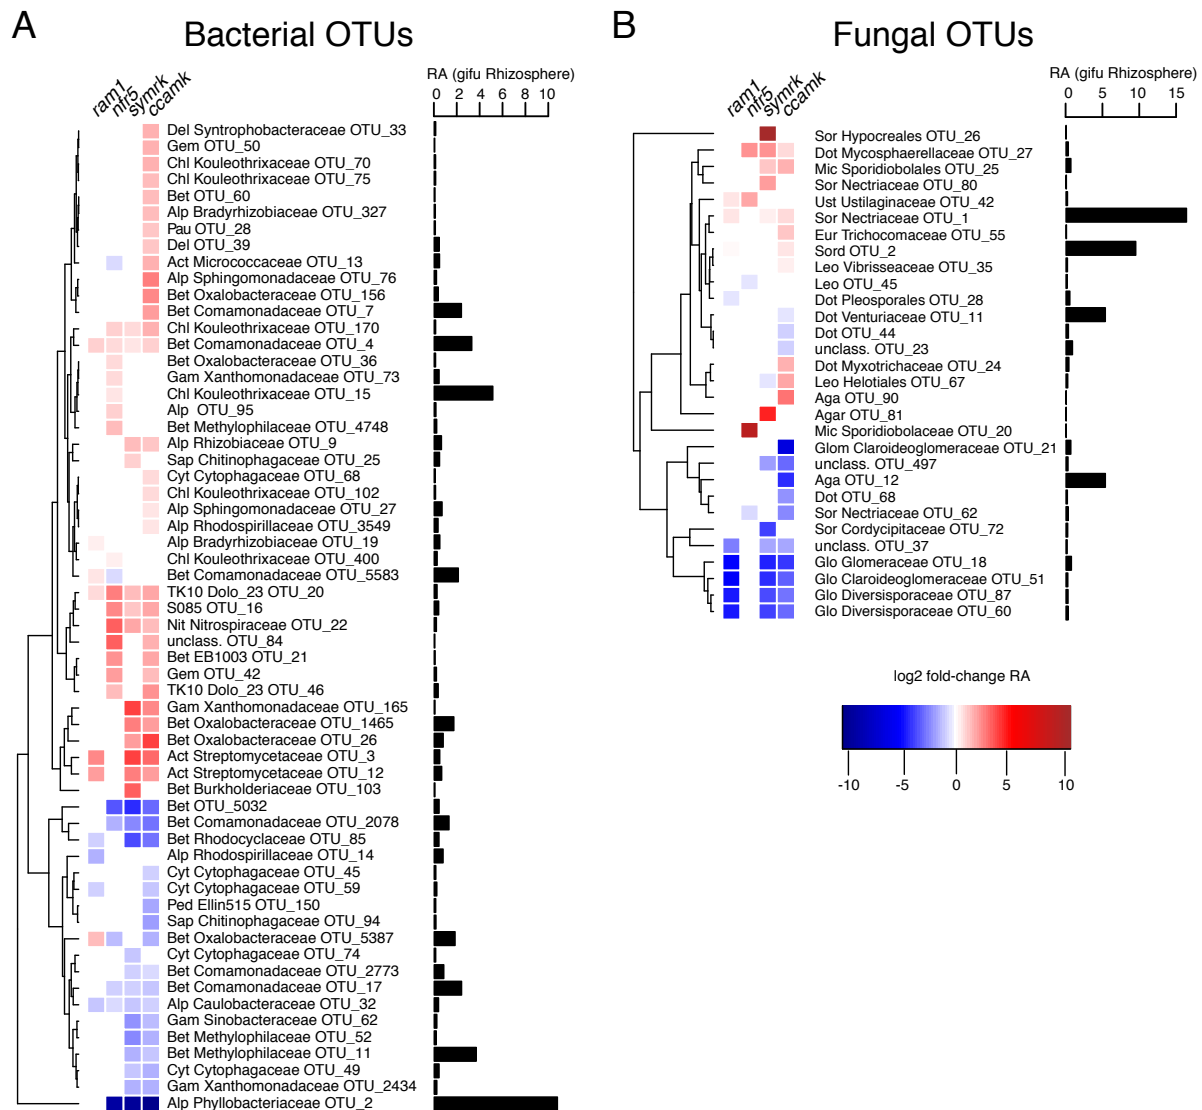

744

745

746 **Supp Fig4, Differential abundance analysis for rhizosphere-associated OTUs showing**  
 747 **enrichment and depletion in mutants.**

748 A) bacterial OTUs that are differentially abundant in the rhizosphere of mutants compared to wt.  
 749 B) fungal OTUs that are differentially abundant in the rhizosphere of mutants compared to wt. Only  
 750 OTUs that have an average RA > 0.1% across all rhizosphere samples, including mutants, are  
 751 considered here. For each OTU, the fold change in RA from wt to mutant is indicated (P < 0.05,  
 752 Kruskal-Wallis test). Next to each OTU the RA in wt rhizosphere is indicated. Phylum and family  
 753 association is given for each OTU (Bacterial phyla: Del=Deltaproteobacteria, Gem=Gemm-1 ,  
 754 Chl=Chloroflexi, Bet=Betaproteobacteria, Alp=Alphaproteobacteria, Gam=Gammaproteobacteria,  
 755 Cyt=Cytophagia, Sap=Saprospirae, Ped=Pedosphaerae, Sph= Sphingobacteria, Mol= Mollicutes ;  
 756 Fungal phyla: Sor=Sordariomycetes, Dot=Dothideomycetes, Mic= Microbotryomycetes,  
 757 Ust=Ustilaginomycetes, Eur=Eurotiomycetes, Leo=Leotiomycetes, Aga=Agaricomycetes,  
 758 Glo=Glomeromycetes, Pez=Peizizomycota, Muc=Mucoromycotina).

759

760

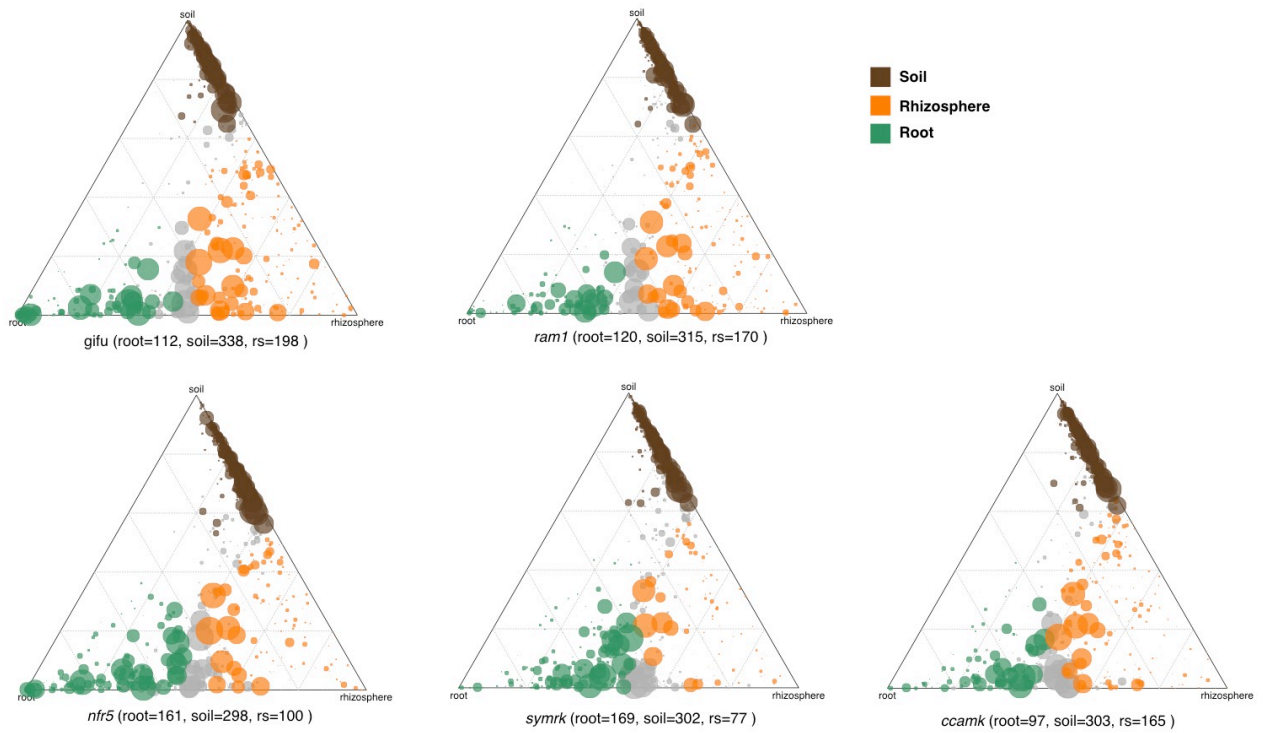

761

762

763

**Supp fig5, Ternary plots showing compartment-enriched bacterial OTUs.** Separately for wt and mutant plants. Below each plot the number of enriched OTUs for each compartment is shown.

764

765

766

767

768

769

770

771

772

773

774

775

776

777

778

779

780

781

782

783

784

785

786

787

788 **Supp table1, Symbiotic phenotype of *Lotus japonicus* wild-type and mutants grown in Cologne**  
789 **soil ( $n=5$ )**

790

| Genotype                                                       | WT(Gifu) | <i>nfr5-2</i> | <i>ram1-2</i> | <i>symrk-2</i> | <i>ccamk-13</i> |
|----------------------------------------------------------------|----------|---------------|---------------|----------------|-----------------|
| Colonization (% of root system with intraradical colonisation) | 60-70    | 60-70         | 10            | 0              | 0               |
| Arbuscules                                                     | present  | present       | present       | none           | none            |
| Nodulation (% of roots with nodules)                           | 100      | 0             | 100           | 0              | 0               |

791
